# Supplementary material for: Gas-phase vibrational spectroscopy of triphenylamine: the effect of charge on structure and spectra
Source: Royal Society of Chemistry journal article supplement (doi:10.1039/c7cp02638b), 2017-01-01
Supplement: c7cp02638b1.pdf [file c7cp02638b1.pdf]

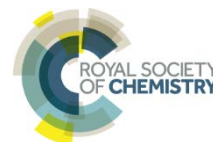

Journal Name

ARTICLE

## Supplementary Information (SI)

### **Gas-phase vibrational spectroscopy of triphenylamine: the effect of charge on structure and spectra**

Musleh Uddin Munshi,<sup>a</sup> Giel Berden<sup>a</sup>, Jonathan Martens<sup>a</sup> and Jos Oomens<sup>a, b, \*</sup>

<sup>a</sup>Radboud University, Institute for Molecules and Materials, FELIX Laboratory, Toernooiveld 7c, 6525 ED Nijmegen, The Netherlands.

<sup>b</sup>University of Amsterdam, Science Park 904, 1098XH Amsterdam, The Netherlands.

\*E-mail: [joso@science.ru.nl](mailto:joso@science.ru.nl)

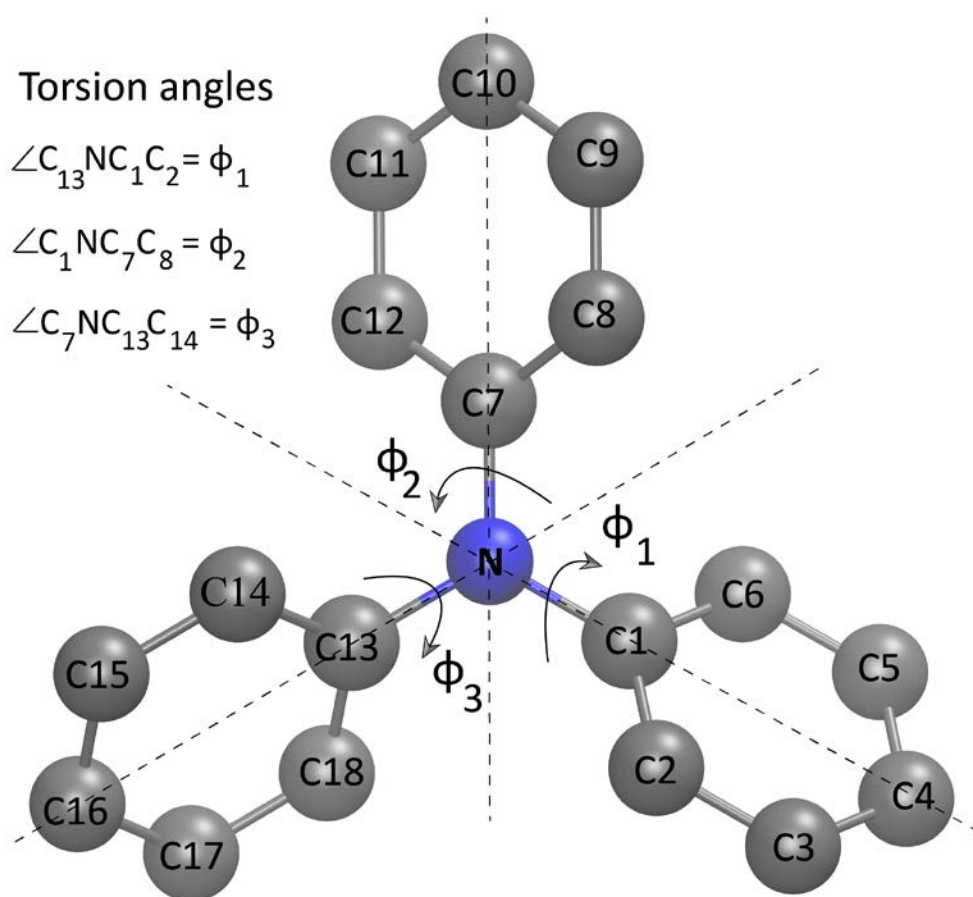

**Figure S1** Schematic representation of TPA (or a radical cation of TPA) geometry, all atoms are numbered except the nitrogen atom at the centre; hydrogen atoms are omitted for clarity. The nitrogen atom is considered in the plane of the paper with carbon atoms C1, C4, C7, C10, C13 and C16. The plane of each of the phenyl moieties makes an angle around the C-N bonds with the plane of the paper; these angles are referred to as torsion angle and are labelled as  $\phi_1$ ,  $\phi_2$ ,  $\phi_3$ , where  $0^\circ$  corresponds to all the atoms being in the plane of the paper. All the torsion angles rotate in the same direction around each of the dotted lines.

**Table S1** Computed rotational constants (in GHz) are shown for neutral TPA and radical cation (TPA<sup>•+</sup>) along with the experimentally determined values for neutral TPA in the gas phase. Parenthesized value is the standard deviation

| Methods                                         | Rotational constants, (GHz)  |                                      |
|-------------------------------------------------|------------------------------|--------------------------------------|
|                                                 | Neutral TPA                  | Radical cation, (TPA <sup>•+</sup> ) |
| Exp (LIF)<br>(for C <sub>3</sub> symmetry, A=B) | A=B=0.4047(5)<br>C=not known | (Not available)                      |
| B3LYP/6-31++G(d,p)                              | A=0.3999, B=0.3987, C=0.2202 | A=0.3993, B=0.3992, C=0.2202         |
| BLYP/cc-pVTZ                                    | A=0.3961, B=0.3955, C=0.2185 | A=0.3993, B=0.3992, C=0.2202         |

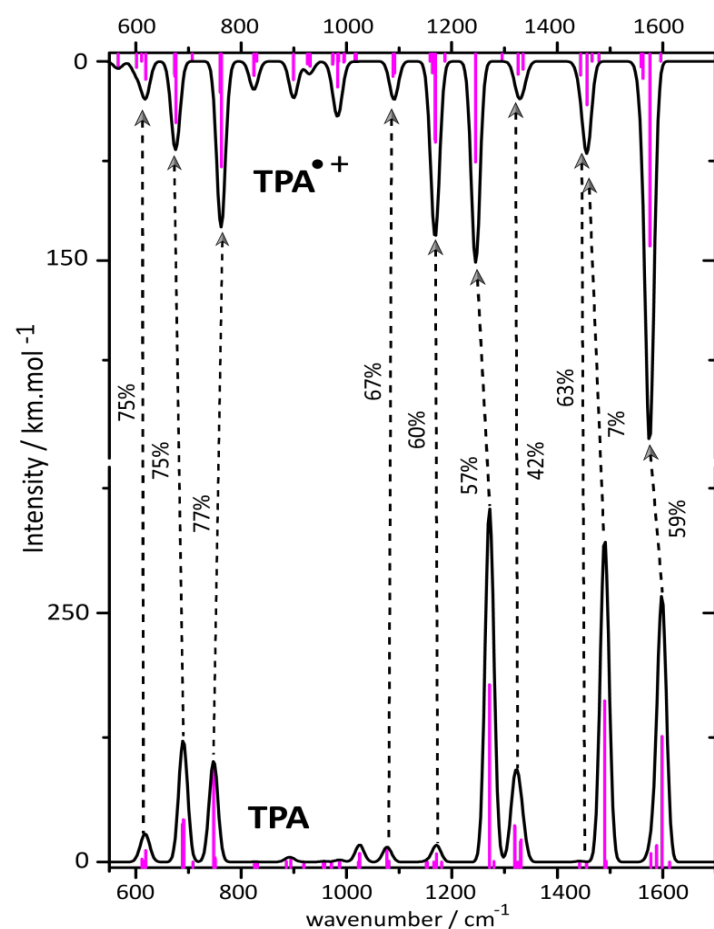

**Figure S2** This figure schematically shows the dominant vibrational projections (%) of the TPA<sup>•+</sup> (top) onto the TPA (bottom) normal modes employed ViPA. These results are taken from Table S2. Similar bands are connected with dotted lines and the percentages of the projections are also shown. For example, each of the IR bands of TPA<sup>•+</sup> from 600-800 cm<sup>-1</sup> represent over 70% of the band character of TPA and are considered the most similar.

**Table S2** Summary of the vibrational projection analysis (ViPA) of the TPA\*\* normal modes onto the basis molecule TPA. In this ViPA analysis, optimized geometry and the corresponding force constants are required as input where hybrid B3LYP/6-31++G(d,p) level of theory was chosen. The calculated normal modes ( $\text{cm}^{-1}$ ) are labelled ( $\nu_1$ - $\nu_{39}$ ) while their intensities ( $>0.5 \text{ k mol}^{-1}$ ) are shown in suffix for both TPA and TPA\*\*. The experimental frequencies ( $\text{cm}^{-1}$ ) are also shown and the widths (FWHM in  $\text{cm}^{-1}$ ) of the determined IR bands are given in parentheses. Differences in frequencies ( $\Delta\text{calc}$ ) are also presented between TPA and TPA\*\* based on their correspondence calculated by ViPA—two theoretical IR bands are considered similar and compared only when any normal mode of the object molecule (TPA\*\*) has maximum projection ( $\leq 100\%$ ) onto a normal mode of another (TPA). According to this guideline, the experimental band shifts are calculated. Qualitatively, the theoretical predicted band shifts ( $\Delta\nu$ ) are reproduced fairly well by the experiment

| Modes of TPA | TPA                       |                        | TPA**                     |           | $\Delta\text{calc}$ | $\Delta\text{exp}$ | Decomposition of the TPA** modes into TPA modes (major contributions only) |
|--------------|---------------------------|------------------------|---------------------------|-----------|---------------------|--------------------|----------------------------------------------------------------------------|
|              | calc ( $\text{cm}^{-1}$ ) | exp                    | calc ( $\text{cm}^{-1}$ ) | exp       |                     |                    |                                                                            |
| $\nu_1$      | 1612                      |                        | 1596                      |           | 16                  |                    | 62% $\nu_1$                                                                |
| $\nu_2$      | 1599 <sub>126}</sub>      | 1590(28)A              | 1575 <sub>139}</sub>      | 1548(23)I | 24                  | 42                 | 59% $\nu_2$ + 8% $\nu_3$                                                   |
| $\nu_3$      | 1588 <sub>16}</sub>       |                        | 1563 <sub>13}</sub>       |           | 25                  |                    | 71% $\nu_3$ + 9% $\nu_2$                                                   |
| $\nu_4$      | 1578 <sub>8}</sub>        |                        | 1559 <sub>4}</sub>        |           | 19                  |                    | 73% $\nu_4$                                                                |
| $\nu_5$      | 1493                      |                        | 1479                      |           | 14                  |                    | 65% $\nu_5$                                                                |
| $\nu_6$      | 1490 <sub>162}</sub>      | 1494(22)B              | 1466                      |           | 24                  |                    | 59% $\nu_6$ + 7% $\nu_7$                                                   |
| $\nu_7$      | 1456                      |                        | 1456 <sub>32}</sub>       | 1446(18)J | 0                   |                    | 63% $\nu_7$ + 7% $\nu_6$                                                   |
| $\nu_8$      | 1442 <sub>1}</sub>        |                        | 1444 <sub>10}</sub>       |           | -2                  |                    | 68% $\nu_8$                                                                |
| $\nu_9$      | 1331 <sub>21}</sub>       |                        | 1336 <sub>3}</sub>        |           | -5                  |                    | 39% $\nu_9$ + 6% $\nu_{10}$ + 23% $\nu_{11}$                               |
| $\nu_{10}$   | 1325                      |                        | 1335 <sub>6}</sub>        |           | -10                 |                    | 57% $\nu_{10}$ + 3% $\nu_{11}$                                             |
| $\nu_{11}$   | 1319 <sub>36}</sub>       | 1327(~30)C             | 1325 <sub>10}</sub>       |           | -6                  |                    | 42% $\nu_{11}$                                                             |
| $\nu_{12}$   | 1279 <sub>0.7}</sub>      |                        | 1294                      |           | -15                 |                    | 67% $\nu_{12}$ + 3% $\nu_{10}$                                             |
| $\nu_{13}$   | 1271 <sub>177}</sub>      | 1278(25)D              | 1245 <sub>75}</sub>       | 1226(40)K | 26                  | 52                 | 57% $\nu_{13}$ + 3% $\nu_{15}$                                             |
| $\nu_{14}$   | 1181                      |                        | 1187                      |           | -6                  |                    | 58% $\nu_{14}$ + 5% $\nu_{16}$                                             |
| $\nu_{15}$   | 1171 <sub>8}</sub>        |                        | 1169 <sub>58}</sub>       | 1160(28)L | 2                   |                    | 60% $\nu_{15}$ + 2% $\nu_{13}$                                             |
| $\nu_{16}$   | 1166                      |                        | 1164                      |           | -13                 |                    | 69% $\nu_{16}$                                                             |
| $\nu_{17}$   | 1153                      |                        | 1163 <sub>9}</sub>        |           | -10                 |                    | 67% $\nu_{17}$                                                             |
| $\nu_{18}$   | 1151 <sub>0.7}</sub>      |                        | 1159                      |           | 7                   |                    | 59% $\nu_{16}$ + 7% $\nu_{12}$ + 4% $\nu_{14}$                             |
| $\nu_{19}$   | 1080 <sub>0.9}</sub>      |                        | 1091 <sub>8}</sub>        |           | -11                 |                    | 67% $\nu_{19}$ + 3% $\nu_{21}$                                             |
| $\nu_{20}$   | 1076 <sub>13}</sub>       | 1074(16)E <sub>1</sub> | 1088 <sub>11}</sub>       |           | -12                 |                    | 67% $\nu_{20}$ + 5% $\nu_{22}$                                             |
| $\nu_{21}$   | 1025 <sub>8}</sub>        | 1030(17)E <sub>2</sub> | 1019                      |           | 6                   |                    | 69% $\nu_{21}$ + 6% $\nu_{19}$                                             |
| $\nu_{22}$   | 1022                      |                        | 1016                      |           | 6                   |                    | 69% $\nu_{22}$ + 6% $\nu_{20}$                                             |
| $\nu_{23}$   | 987 <sub>1}</sub>         |                        | 996                       |           | -25                 |                    | 78% $\nu_{26}$ + 3% $\nu_{25}$                                             |
| $\nu_{24}$   | 986 <sub>1}</sub>         |                        | 995 <sub>0.6}</sub>       |           | -23                 |                    | 80% $\nu_{25}$ + 2% $\nu_{26}$                                             |
| $\nu_{25}$   | 972                       |                        | 986                       |           | 0                   |                    | 69% $\nu_{24}$                                                             |
| $\nu_{26}$   | 971                       |                        | 983 <sub>19}</sub>        | 988(13)M  | 4                   |                    | 69% $\nu_{23}$                                                             |
| $\nu_{27}$   | 958                       |                        | 975                       |           | -17                 |                    | 78% $\nu_{27}$                                                             |
| $\nu_{28}$   | 956                       |                        | 974 <sub>2}</sub>         |           | -18                 |                    | 77% $\nu_{28}$                                                             |
| $\nu_{29}$   | 919                       |                        | 931 <sub>3}</sub>         |           | -12                 |                    | 52% $\nu_{29}$ + 26% $\nu_{31}$                                            |
| $\nu_{30}$   | 894 <sub>4}</sub>         |                        | 926 <sub>2}</sub>         |           | -32                 |                    | 80% $\nu_{30}$                                                             |
| $\nu_{31}$   | 886 <sub>0.6}</sub>       |                        | 900 <sub>13}</sub>        |           | -14                 |                    | 52% $\nu_{31}$ + 20% $\nu_{29}$                                            |
| $\nu_{32}$   | 831                       |                        | 830                       |           | 1                   |                    | 80% $\nu_{32}$                                                             |
| $\nu_{33}$   | 826                       |                        | 825 <sub>10}</sub>        |           | 1                   |                    | 81% $\nu_{33}$                                                             |
| $\nu_{34}$   | 751 <sub>2}</sub>         |                        | 762 <sub>79}</sub>        | 758(15)N  | -14                 | -8                 | 77% $\nu_{35}$ + 5% $\nu_{34}$                                             |
| $\nu_{35}$   | 748 <sub>96}</sub>        | 750(16)F               | 761 <sub>23}</sub>        |           | -10                 |                    | 77% $\nu_{34}$                                                             |
| $\nu_{36}$   | 709                       |                        | 707                       |           | 2                   |                    | 69% $\nu_{36}$                                                             |
| $\nu_{37}$   | 691 <sub>42}</sub>        | 696(19)G               | 677 <sub>46}</sub>        | 672(12)O  | 11                  | 24                 | 76% $\nu_{38}$ + 3% $\nu_{37}$ + 2% $\nu_{34}$                             |
| $\nu_{38}$   | 688 <sub>37}</sub>        |                        | 674 <sub>11}</sub>        |           | 17                  |                    | 81% $\nu_{37}$ + 2% $\nu_{38}$                                             |
| $\nu_{39}$   | 619 <sub>11}</sub>        | 622(18)H               | 619 <sub>13}</sub>        | 618(10)P  | 0                   | 4                  | 75% $\nu_{39}$                                                             |

**Table S3** Absolute Proton Affinity (in  $\text{kJ mol}^{-1}$ ) obtained from the DFT calculations

| DFT level of theory                          | Absolute proton affinities of the protomers of TPA ( $\text{kJ mol}^{-1}$ ) |                 |                  |                 |
|----------------------------------------------|-----------------------------------------------------------------------------|-----------------|------------------|-----------------|
|                                              | N-protonated                                                                | para-protonated | ortho-protonated | meta-protonated |
| MP2(full)/6-311+G(2d,2p)//B3LYP/6-31++G(d,p) | 913.5                                                                       | 891.1           | 872.2            | 769.4           |
